# Supplementary material for: A transient coupled general circulation model (CGCM) simulation of the past 3 million years
Source: Copernicus journal article supplement (doi:10.5194/cp-19-1951-2023), 2023-10-13
Supplement: Supplementary file 1 [file cp-19-1951-2023-supplement.pdf]

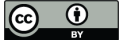

*Supplement of*

## **A transient coupled general circulation model (CGCM) simulation of the past 3 million years**

**Kyung-Sook Yun et al.**

*Correspondence to:* Kyung-Sook Yun (kssh@pusan.ac.kr) and Axel Timmermann (axel@ibsclimate.org)

The copyright of individual parts of the supplement might differ from the article licence.

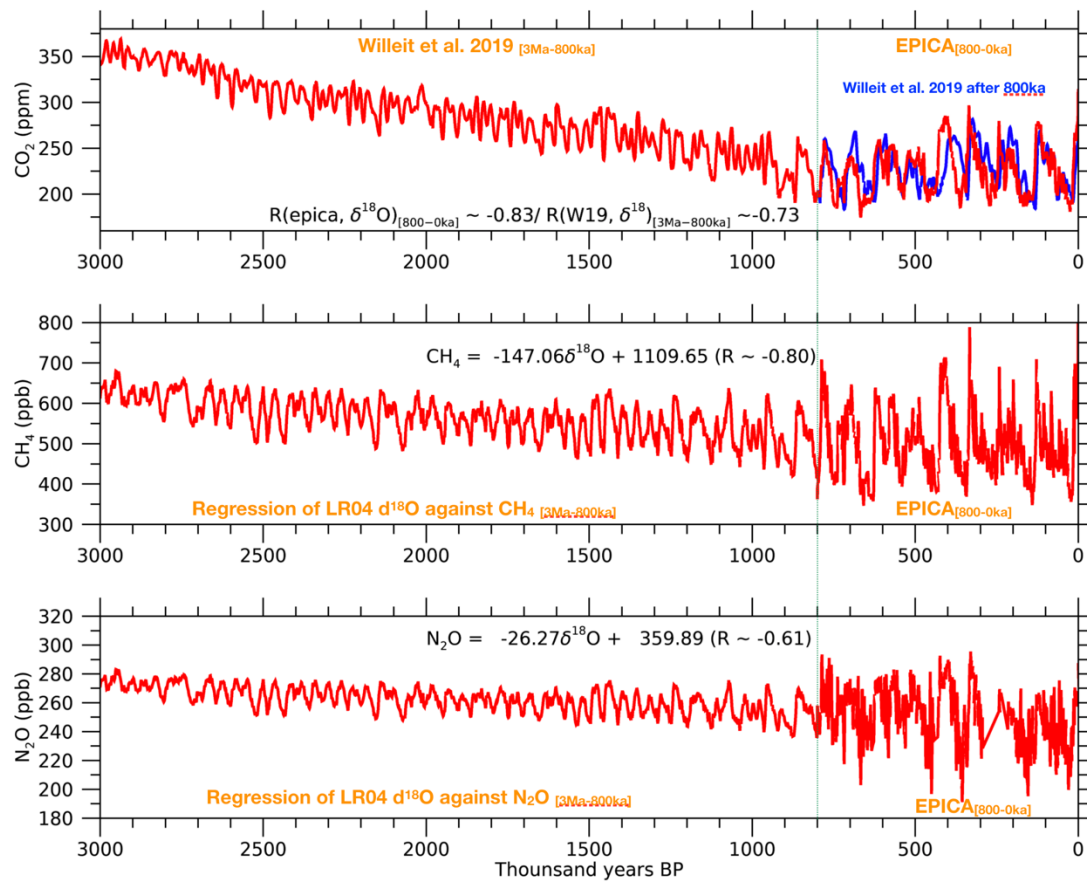

8

9 **Figure S1 | Greenhouse-gases forcing.** (a) Reconstructed CO<sub>2</sub> forcing (red) by combining two datasets of  
 10 the European Project for Ice Coring in Antarctica (EPICA) Dome ice core data (Lüthi et al. 2008) after  
 11 800ka and Willeit et al. (2019) before 800ka. Blue line indicates the CO<sub>2</sub> forcing from Willeit et al. (2019).  
 12 (b-c) Reconstructed (b) CH<sub>4</sub> and (c) N<sub>2</sub>O forcings by combining two datasets of EPICA CH<sub>4</sub> (Loulergue et  
 13 al. 2008) and N<sub>2</sub>O (Spahni et al. 2005) data after 800ka and regression model before 800ka. Here, the  
 14 regression was conducted using the linear relationship between LR04 stack (Lisiecki and Raymo 2005) and  
 15 the greenhouse-gases during the EPICA 800 kyr. The regression coefficients were displayed by equation of  
 16 each panel.

17

18

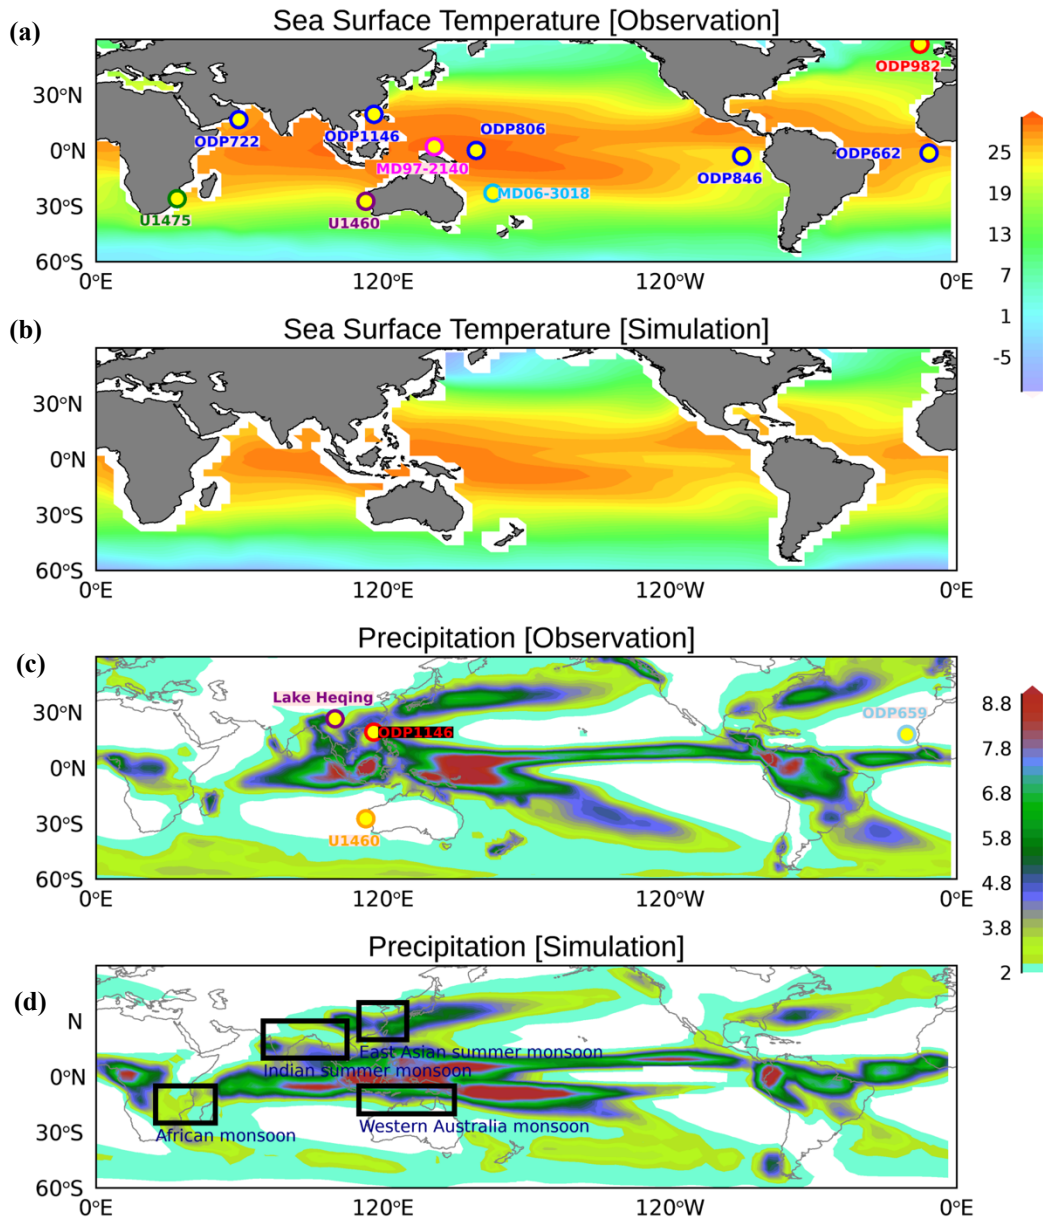

19

20 **Figure S2 | SST and precipitation pattern.** (a) Observed SST pattern during 1979-2008 from ERSST5

21 and proxy locations used in this study. (b) Simulated SST pattern over the entire 3Myr. (c) Observed

22 precipitation pattern during 1979-2008 from GPCP and proxy locations. (d) Simulated precipitation pattern

23 over the 3Myr and monsoon domains used in this study.

24

25

26

27

28

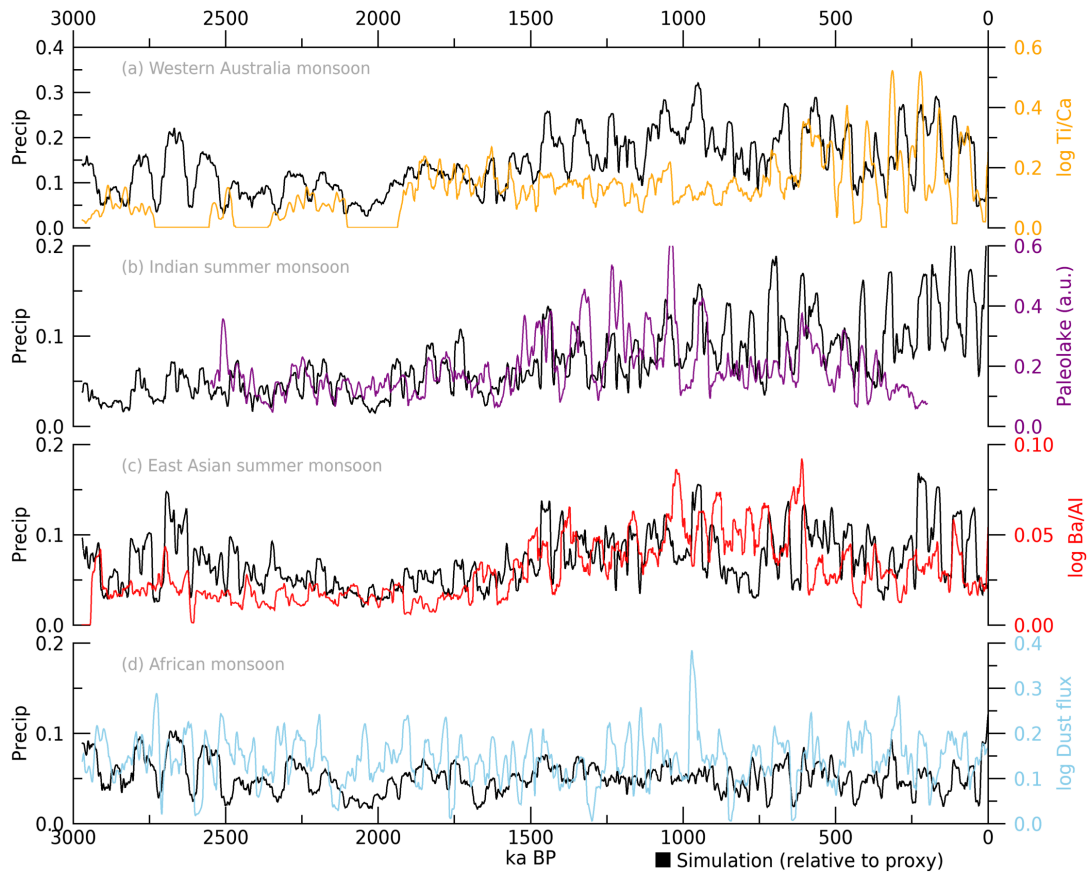

29

30 **Figure S3 | Changes in monsoon variability amplitude.** Sliding standard deviation of precipitation (unit:  
 31 mm d<sup>-1</sup>) and proxies over 31-kyr time window: (a) Western Australia monsoon from simulation averaged  
 32 over 20°S-5°S, 110°E-150°E (black) and from proxies of IODP site U1460 log Ti/Ca (Petrick et al. 2019;  
 33 orange); (b) Indian summer monsoon from simulation averaged over 10°N-30°N, 70°E-105°E (black) and  
 34 from proxies of Lake Heqing (An et al. 2011; purple); (c) East Asian summer monsoon from simulation  
 35 averaged over 20°N-40°N, 110°E-130°E (black) and from proxies of ODP 1146 log Ba/Al (Clemens et al.  
 36 2008; red); (d) western African monsoon from simulation averaged over 25°S-5°S, 25°E-50°E (black) and  
 37 from proxies of ODP 659 log Dust flux (Tiedemann et al. 1994; sky blue).

38

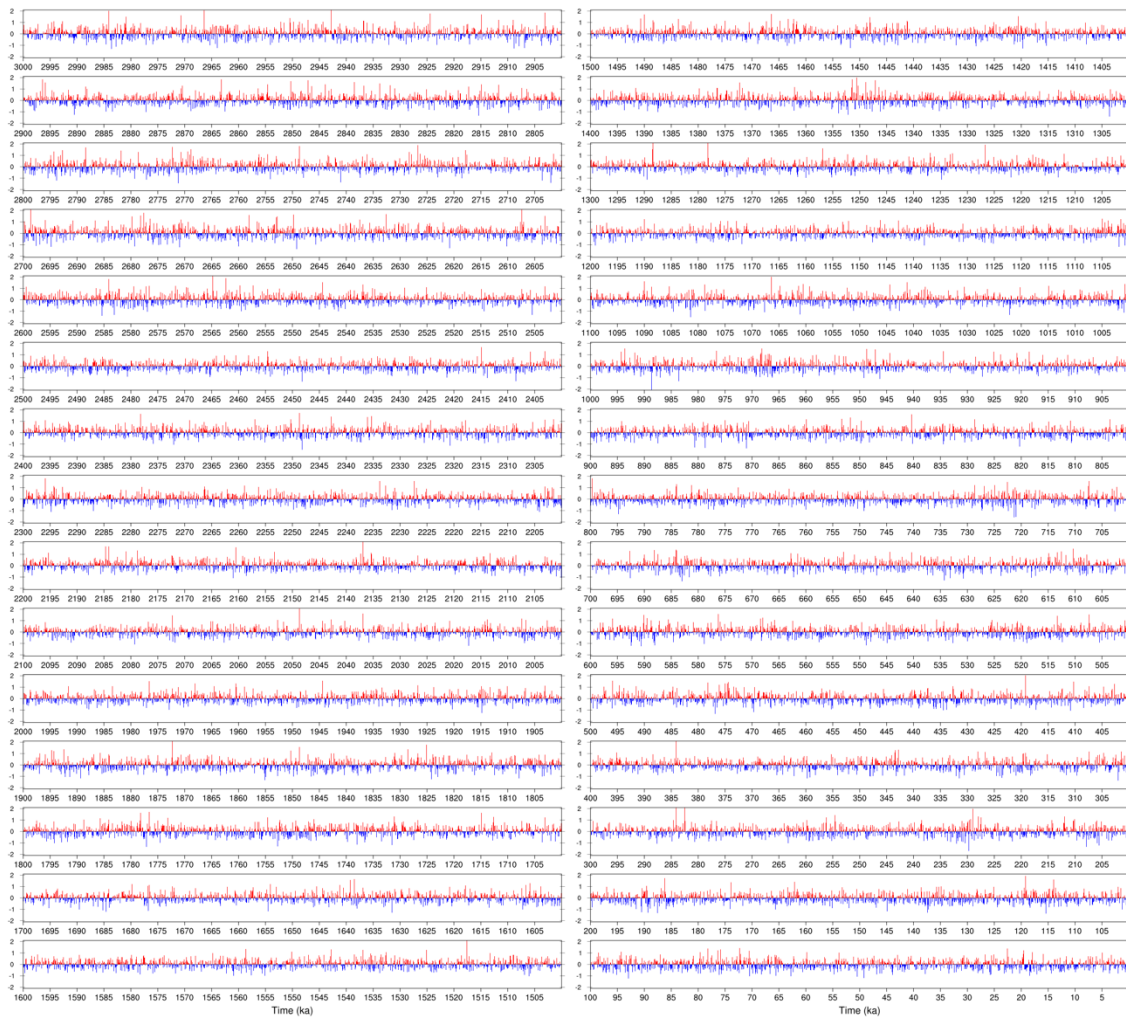

39  
 40  
 41  
 42

**Figure S4 | Monthly ENSO variability.** Timeseries of Niño 3 index defined as 1.5-7-year band-pass filtered Niño 3 SST.

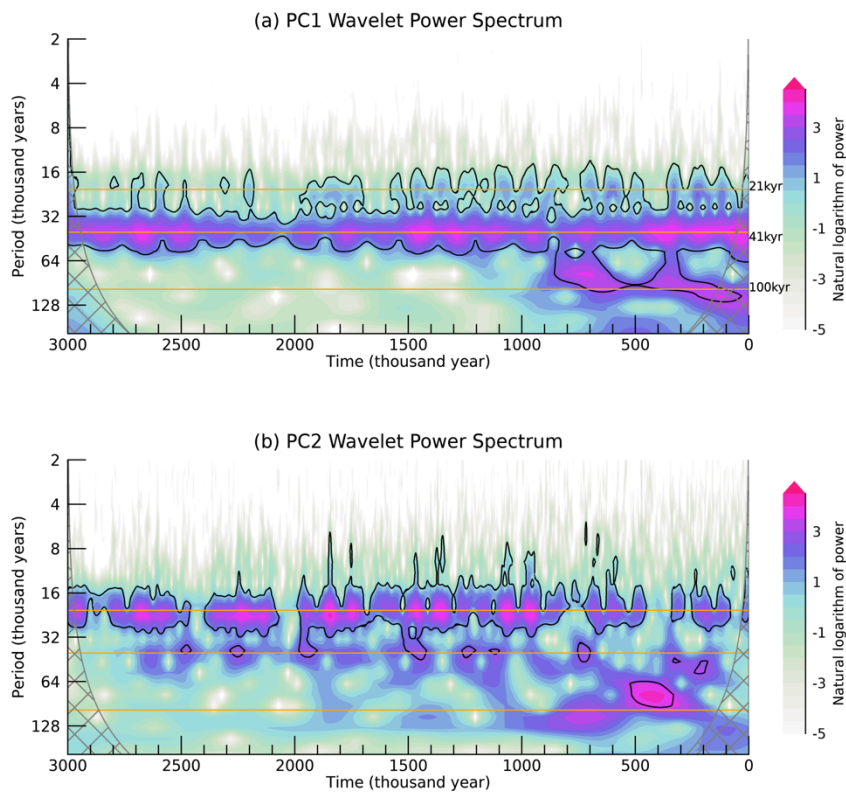

43  
 44  
 45  
 46  
 47  
 48  
 49  
 50  
 51  
 52  
 53  
 54  
 55  
 56  
 57  
 58  
 59

**Figure S5 | Wavelet power spectrum of PCs of two dominant MHT modes.** The wavelet power spectrum of (a) PC1, and (b) PC2. The black contour indicates the value significant at the 95% confidence level. The horizontal orange lines show 21-kyr (precession), 41-kyr (obliquity), and 100-kyr (eccentricity) periods.

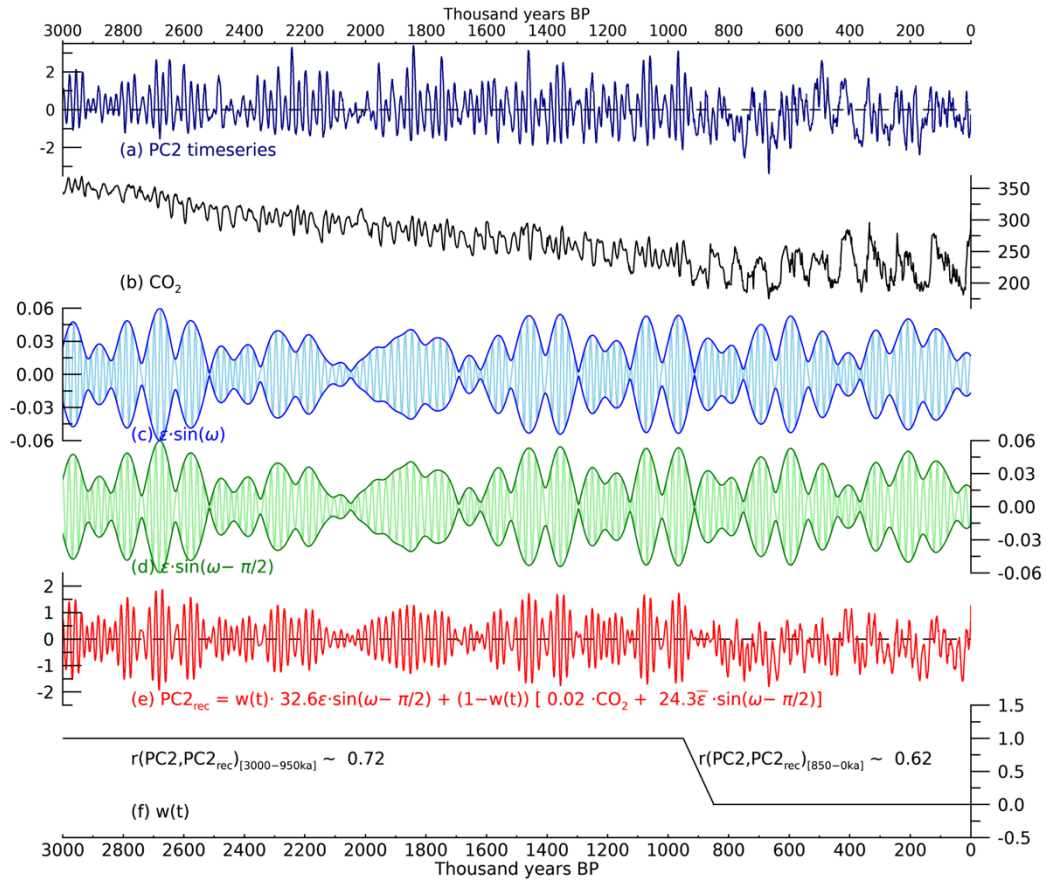

60  
 61  
 62  
 63  
 64  
 65  
 66  
 67  
 68  
 69  
 70  
 71

**Figure S6 | A simple model for reconstructing PC2 time series using eccentricity-modulated precession and CO<sub>2</sub>.** (a) Original PC2 time series, (b) CO<sub>2</sub> forcing, (c) eccentricity (blue)-modulated precession (sky blue) variability. (d) 90° out-of-phase precession variability, (e) reconstructed PC2 time series using 90° out-of-phase precession and CO<sub>2</sub> forcing, and (f) weight function in the reconstruction. The coefficients in (e) are obtained using a simple regression model against the PC2 time series.



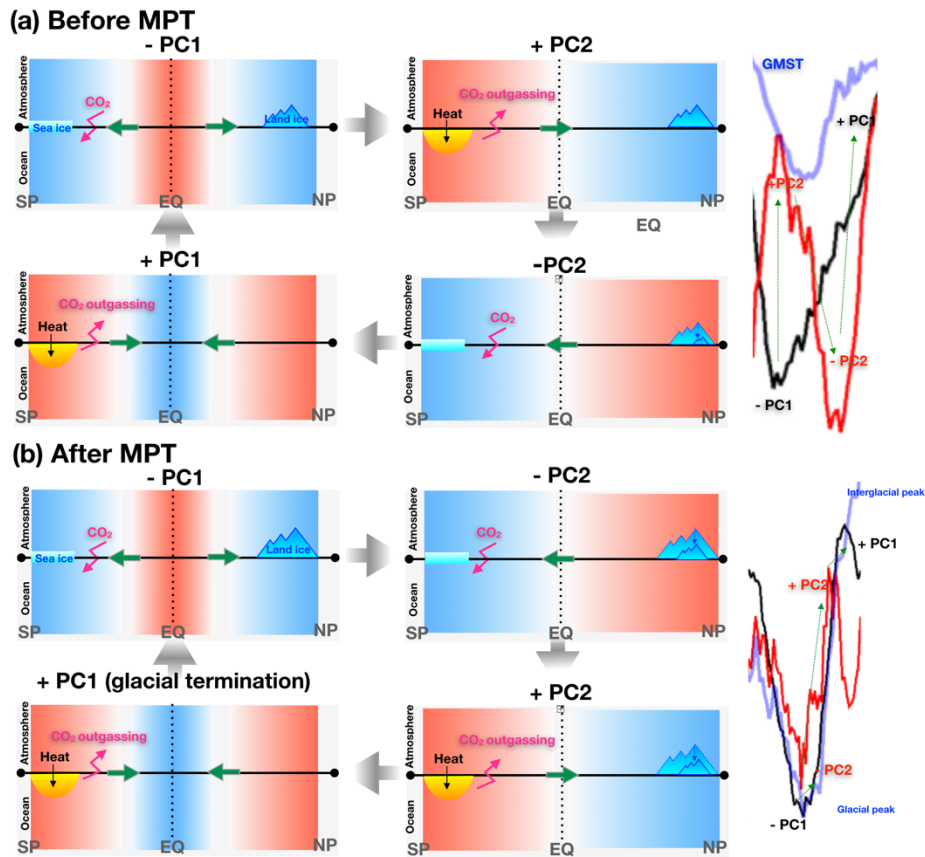

72

73 **Figure S7 | PC1-PC2 cycle and the potential feedback with carbon cycle.** The cycle of PC1 and PC2 (a)  
 74 before the MPT and (b) after the MPT. Before the MPT, the negative PC1 tends to be followed by the  
 75 positive PC2 and it becomes the other way around. Meanwhile, after the MPT, the negative PC1 tends to  
 76 be followed by the negative PC2 during the glacial peak. The transition into positive phases of PC2 and  
 77 PC1 is concurrent with the glacial termination. The negative phases of PC1 and PC2 are likely to enhance  
 78 the Southern Ocean CO<sub>2</sub> sequestration into the ocean, associated with the sea ice/carbon cycle feedback  
 79 (Stein et al. 2020). By contrast, the positive phases of PC1 and PC2 are related to the Southern Ocean  
 80 warming and the enhanced CO<sub>2</sub> leak outgoing into the atmosphere. Here, blue (red) shading and green  
 81 arrow show an anomalous cooling (warming) and direction of heat transport.

82

83

84

85

86

87

88

89



90 **References**

- 91 An, Z., and Coauthors, 2011: Glacial-Interglacial Indian Summer Monsoon Dynamics.  
92 *Science*, **333**, 719-723.
- 93 Clemens, S. C., W. L. Prell, Y. Sun, Z. Liu, and G. Chen, 2008: Southern Hemisphere  
94 forcing of Pliocene  $\delta^{18}\text{O}$  and the evolution of Indo-Asian monsoons. *Paleoceanography*,  
95 **23**.
- 96 Lisiecki, L. E., and M. E. Raymo, 2005: A Pliocene-Pleistocene stack of 57 globally  
97 distributed benthic  $\delta^{18}\text{O}$  records. *Paleoceanography*, **20**.
- 98 Louergue, L., and Coauthors, 2008: Orbital and millennial-scale features of atmospheric  
99  $\text{CH}_4$  over the past 800,000 years. *Nature*, **453**, 383-386.
- 100 Lüthi, D., and Coauthors, 2008: High-resolution carbon dioxide concentration record  
101 650,000–800,000 years before present. *Nature*, **453**, 379-382.
- 102 Petrick, B., and Coauthors, 2019: Glacial Indonesian Throughflow weakening across the  
103 Mid-Pleistocene Climatic Transition. *Sci Rep-Uk*, **9**, 16995.
- 104 Spahni, R., and Coauthors, 2005: Atmospheric Methane and Nitrous Oxide of the Late  
105 Pleistocene from Antarctic Ice Cores. *Science*, **310**, 1317-1321.
- 106 Stein, K., A. Timmermann, E. Y. Kwon, and T. Friedrich, 2020: Timing and magnitude of  
107 Southern Ocean sea ice/carbon cycle feedbacks. *Proceedings of the National Academy of*  
108 *Sciences*, **117**, 4498-4504.

109 Tiedemann, R., M. Sarnthein, and N. J. Shackleton, 1994: Astronomic timescale for the  
110 Pliocene Atlantic  $\delta^{18}\text{O}$  and dust flux records of Ocean Drilling Program Site 659.  
111 *Paleoceanography*, **9**, 619-638.

112 Willeit, M., A. Ganopolski, R. Calov, and V. Brovkin, 2019: Mid-Pleistocene transition  
113 in glacial cycles explained by declining  $\text{CO}_2$  and regolith removal. *Sci Adv*, **5**.

114
